# Supplementary material
Source: PubMed Central journal article supplement (PMC3288240)
Supplement: NIHMS347060-supplement-1.pdf [file NIHMS347060-supplement-1.pdf]

**Supplementary Data Table T1.** Analysis of AJAP1 deletion, expression, and methylation in 80 primary glioblastoma tumor samples. NB=normal brain, N=normal gene expression (0.9-1 relative to NB), I=intermediate gene expression (0.3-0.89), L=low/absent gene expression (0-0.29), LOH=loss of heterozygosity, HOMO=homozygous loss.

| Primary tumors | Mutation | Deletion | Expression level | Expresion= normal,intermediate,low/none | MS-qPCR |
|----------------|----------|----------|------------------|-----------------------------------------|---------|
| NB             | none     | present  | 1                | N                                       | 0       |
| 1              | none     | present  | 0.01             | L                                       | 9       |
| 2              | none     | present  | 0.28             | L                                       | 0       |
| 3              | none     | present  | 0.29             | L                                       | 0       |
| 4              | none     | present  | 0.03             | L                                       | 30      |
| 5              | none     | present  | 0.1              | L                                       | 27      |
| 6              | none     | present  | 0.22             | L                                       | 12      |
| 7              | none     | present  | 0.5              | I                                       | 35      |
| 8              | none     | present  | 0.02             | L                                       | 22      |
| 9              | none     | HOMO     | 0.03             | L                                       | 0       |
| 10             | none     | present  | 0.61             | I                                       | 5       |
| 11             | none     | present  | 0.07             | L                                       | 22      |
| 12             | none     | present  | 1                | N                                       | 0       |
| 13             | none     | present  | 0.25             | L                                       | 0       |
| 14             | none     | present  | 0.29             | L                                       | 0       |
| 15             | none     | present  | 0.26             | L                                       | 0       |
| 16             | none     | present  | 0.31             | I                                       | 40      |
| 17             | none     | present  | 0.18             | L                                       | 8       |
| 18             | none     | present  | 0.29             | L                                       | 32      |
| 19             | none     | present  | 0.03             | L                                       | 51      |
| 20             | none     | present  | 0.02             | L                                       | 11      |
| 21             | none     | present  | 0.04             | L                                       | 23      |
| 22             | none     | present  | 0.01             | L                                       | 30      |
| 23             | none     | LOH      | 0.04             | L                                       | 39      |
| 24             | none     | present  | 0.28             | L                                       | 0       |
| 25             | none     | present  | 0.03             | L                                       | 35      |
| 26             | none     | present  | 0.21             | L                                       | 15      |
| 27             | none     | present  | 0.01             | L                                       | 40      |
| 28             | none     | present  | 0.15             | L                                       | 22      |
| 29             | none     | HOMO     | 0.02             | L                                       | 0       |
| 30             | none     | present  | 0.18             | L                                       | 11      |
| 31             | none     | present  | 0.22             | L                                       | 25      |
| 32             | none     | present  | 1                | N                                       | 0       |
| 33             | none     | present  | 0.19             | L                                       | 21      |
| 34             | none     | present  | 0.1              | L                                       | 57      |
| 35             | none     | present  | 0.09             | L                                       | 38      |
| 36             | none     | HOMO     | 0.1              | L                                       | 0       |

|    |      |         |      |   |    |
|----|------|---------|------|---|----|
| 37 | none | present | 0.08 | L | 40 |
| 38 | none | present | 0.24 | L | 2  |
| 39 | none | present | 0.1  | L | 38 |
| 40 | none | LOH     | 0.05 | L | 3  |
| 41 | none | present | 0.07 | L | 20 |
| 42 | none | LOH     | 0.6  | I | 0  |
| 43 | none | present | 0.18 | L | 12 |
| 44 | none | present | 0    | L | 59 |
| 45 | none | present | 0.02 | L | 33 |
| 46 | none | present | 0.11 | L | 18 |
| 47 | none | present | 0.02 | L | 31 |
| 48 | none | HOMO    | 0.01 | L | 0  |
| 49 | none | present | 0.01 | L | 48 |
| 50 | none | present | 2.5  | L | 11 |
| 51 | none | present | 0.02 | L | 52 |
| 52 | none | present | 0.95 | N | 0  |
| 53 | none | present | 0.03 | L | 45 |
| 54 | none | present | 0.29 | L | 0  |
| 55 | none | LOH     | 0.04 | L | 40 |
| 56 | none | present | 0.01 | L | 62 |
| 57 | none | present | 0.45 | I | 0  |
| 58 | none | LOH     | 0.03 | L | 30 |
| 59 | none | present | 0.24 | L | 41 |
| 60 | none | present | 0.28 | L | 0  |
| 61 | none | present | 0.29 | L | 0  |
| 62 | none | present | 0.28 | L | 0  |
| 63 | none | HOMO    | 0.01 | L | 0  |
| 64 | none | present | 0.26 | L | 45 |
| 65 | none | present | 0.28 | L | 70 |
| 66 | none | present | 0.22 | L | 25 |
| 67 | none | present | 1    | N | 0  |
| 68 | none | present | 0.24 | L | 35 |
| 69 | none | present | 0.28 | L | 38 |
| 70 | none | present | 0.33 | I | 0  |
| 71 | none | present | 0.2  | L | 25 |
| 72 | none | present | 0.29 | L | 0  |
| 73 | none | LOH     | 0.04 | L | 35 |
| 74 | none | present | 0.18 | L | 20 |
| 75 | none | present | 0.2  | L | 0  |
| 76 | none | present | 0.28 | L | 0  |
| 77 | none | present | 0.17 | L | 23 |
| 78 | none | LOH     | 0.07 | L | 32 |
| 79 | none | present | 0.1  | L | 14 |
| 80 | none | present | 0.12 | L | 21 |
